# Supplementary material
Source: PubMed Central journal article supplement (PMC9669991)

Figure S1

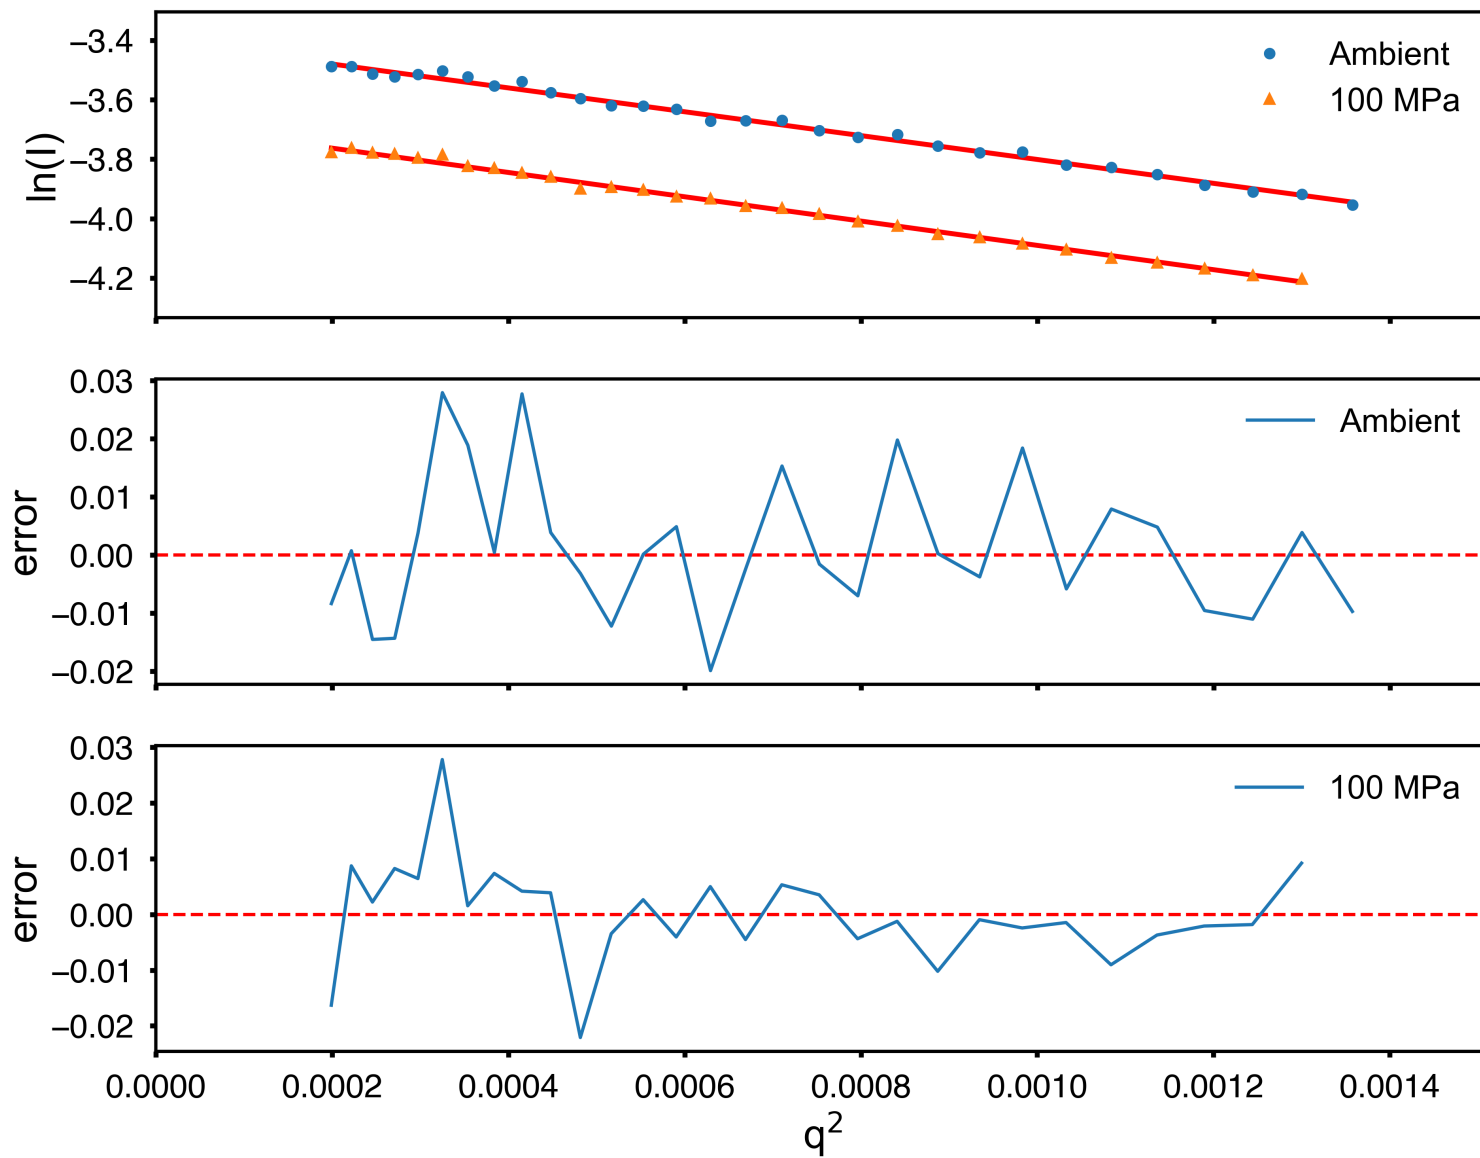

Figure S2

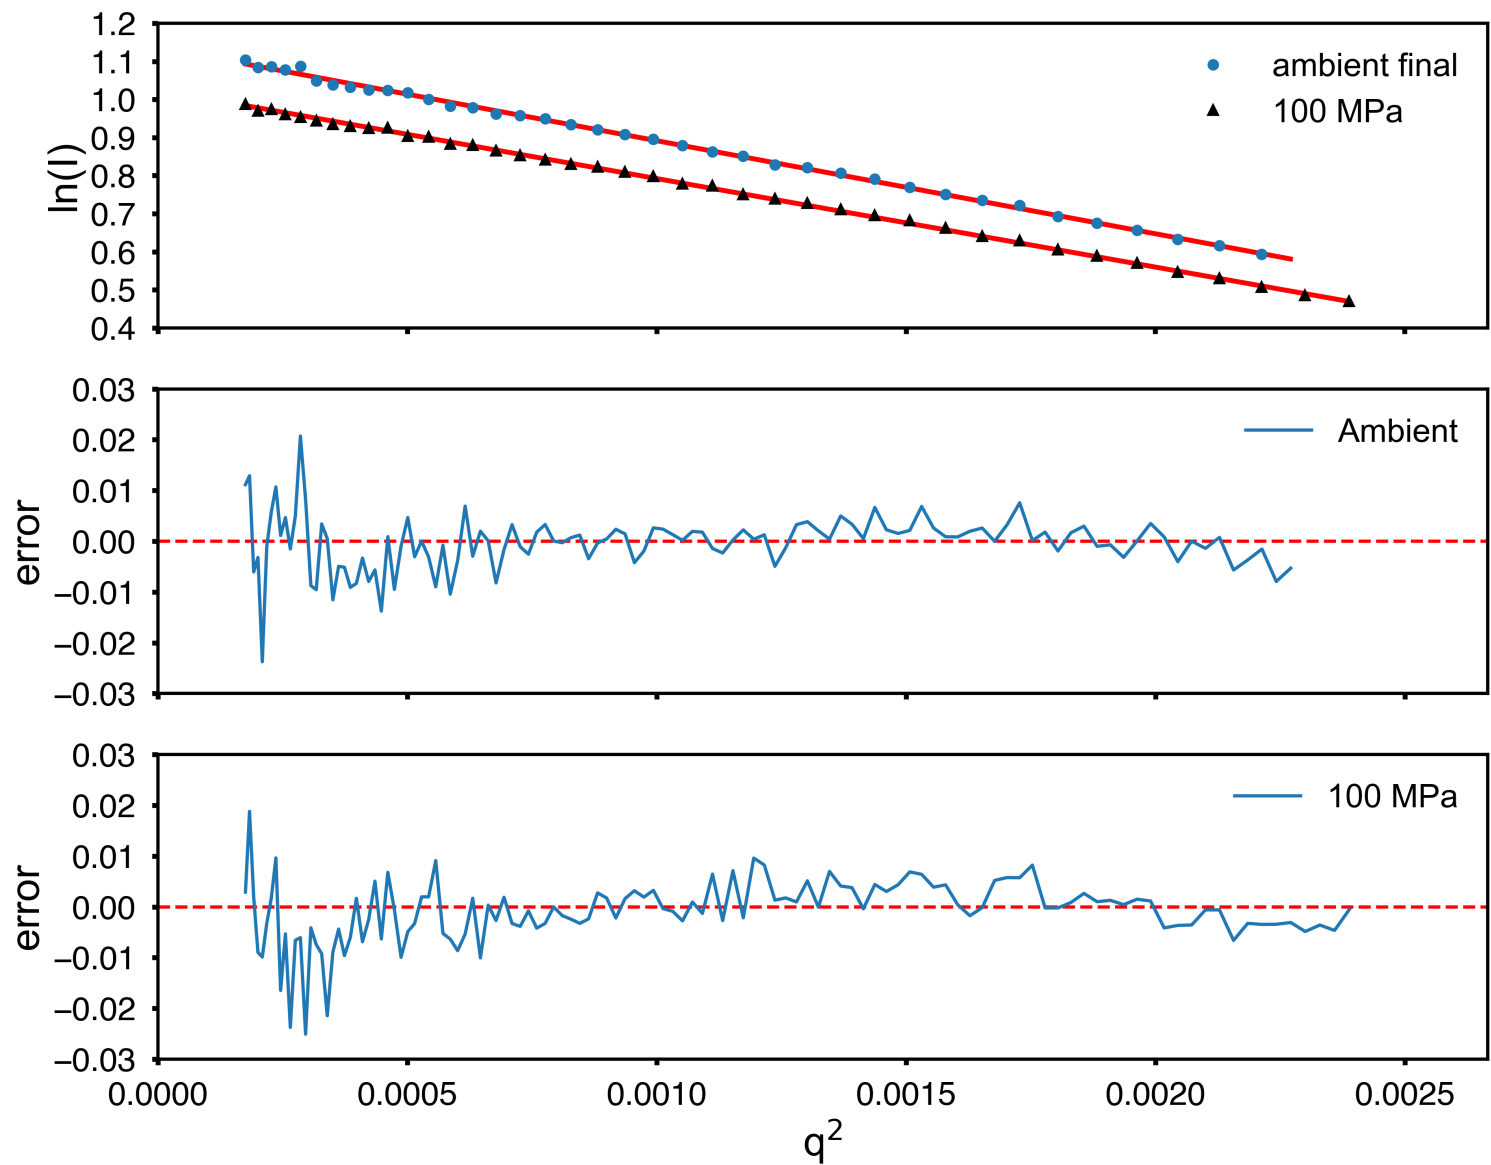

Figure S3

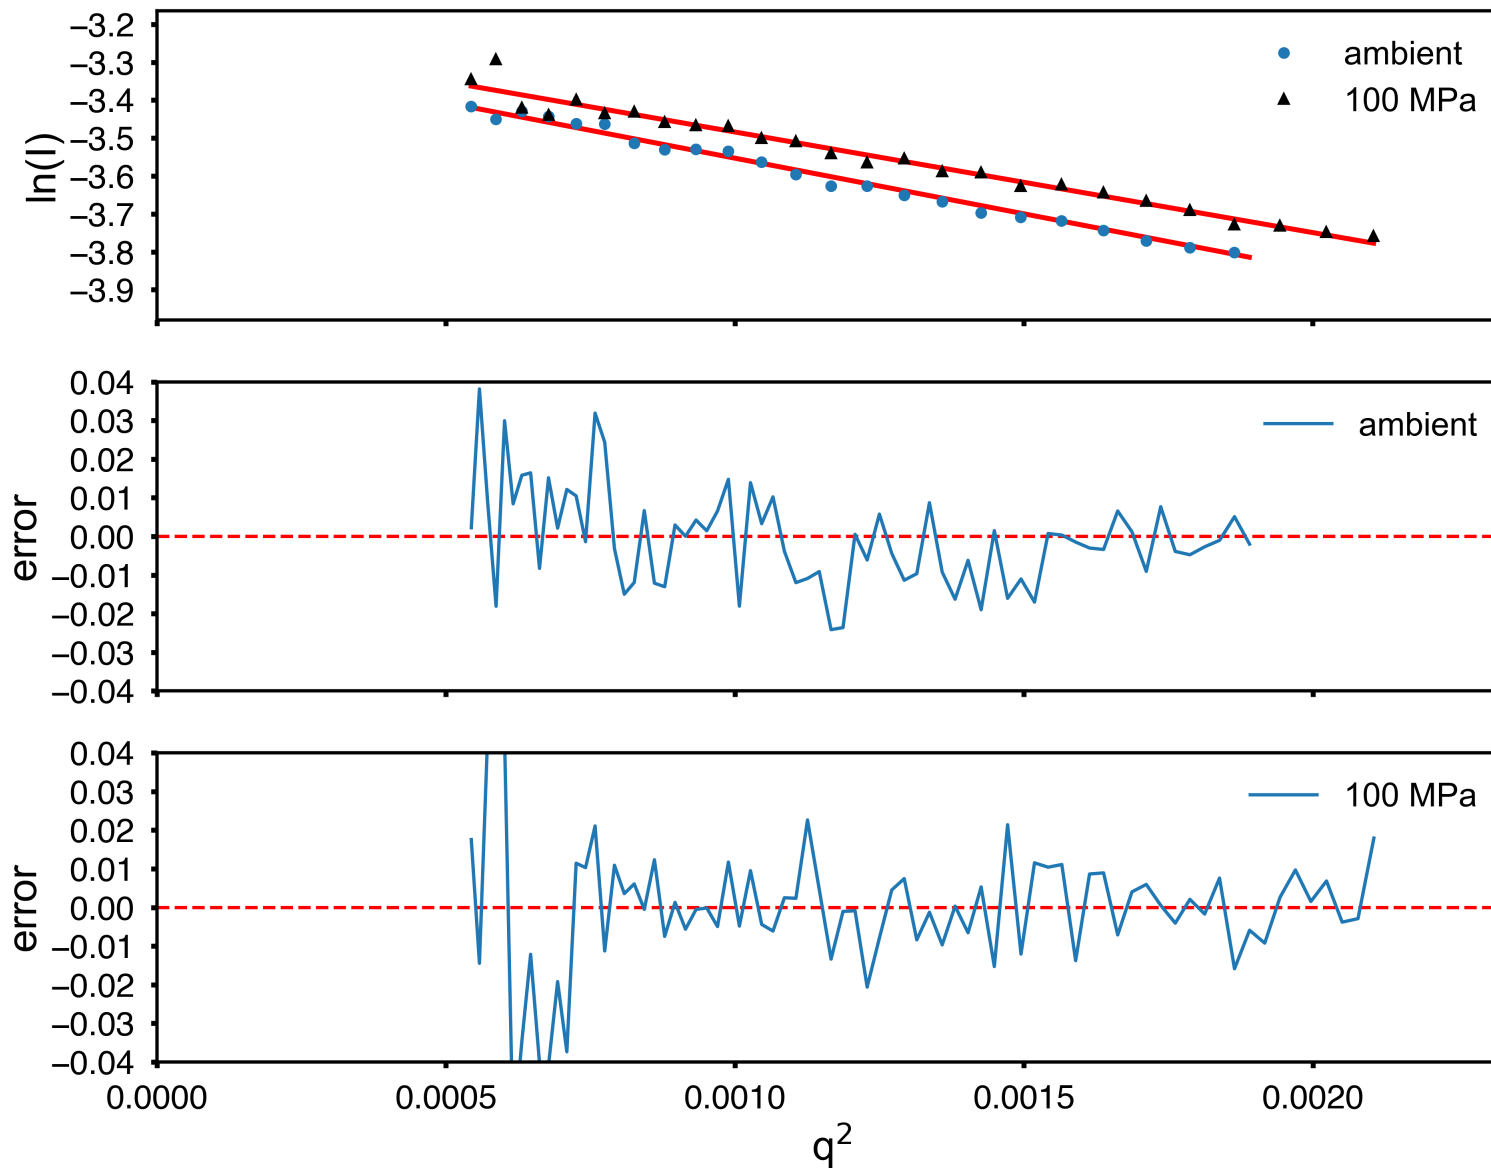

Figure S4

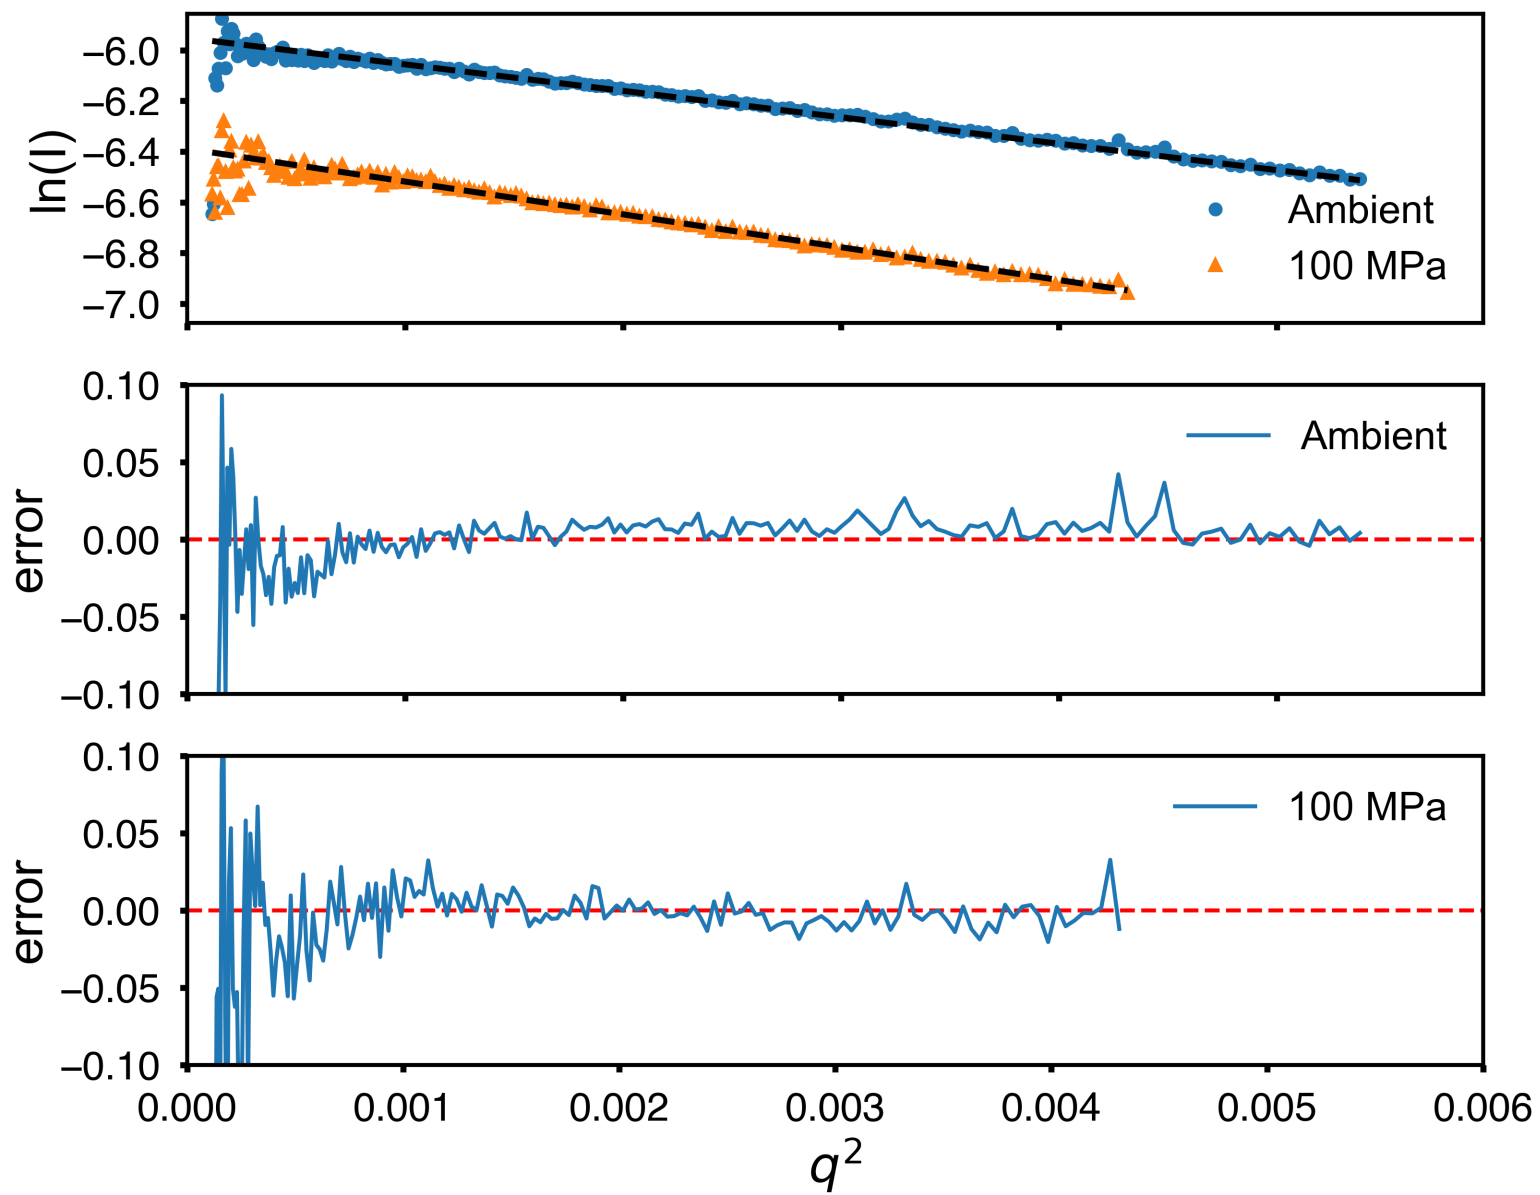

Figure S5

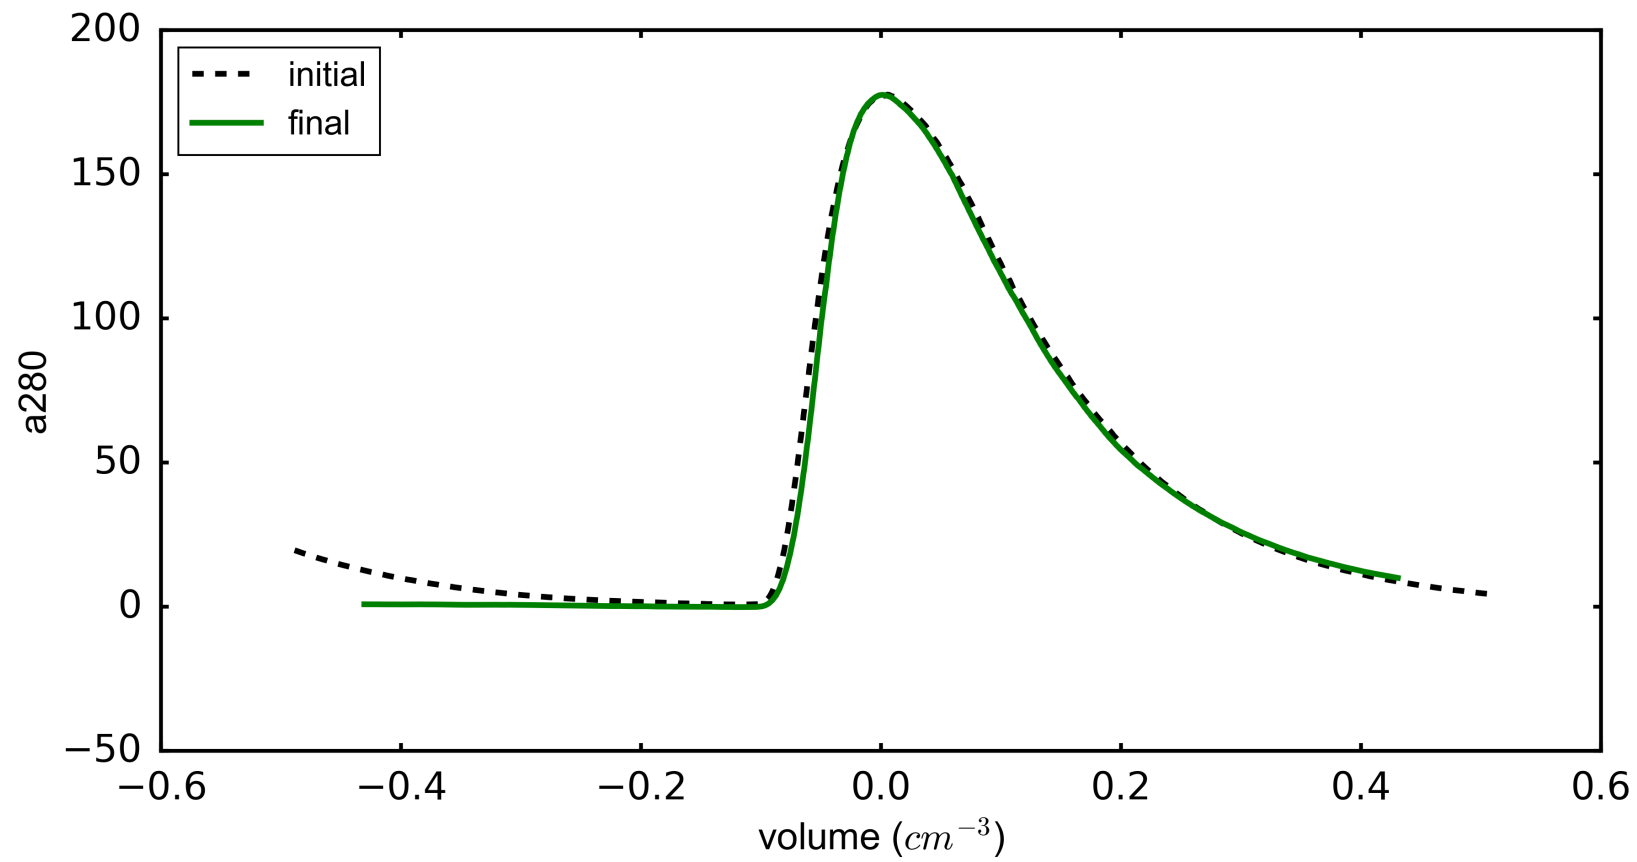

Figure S6

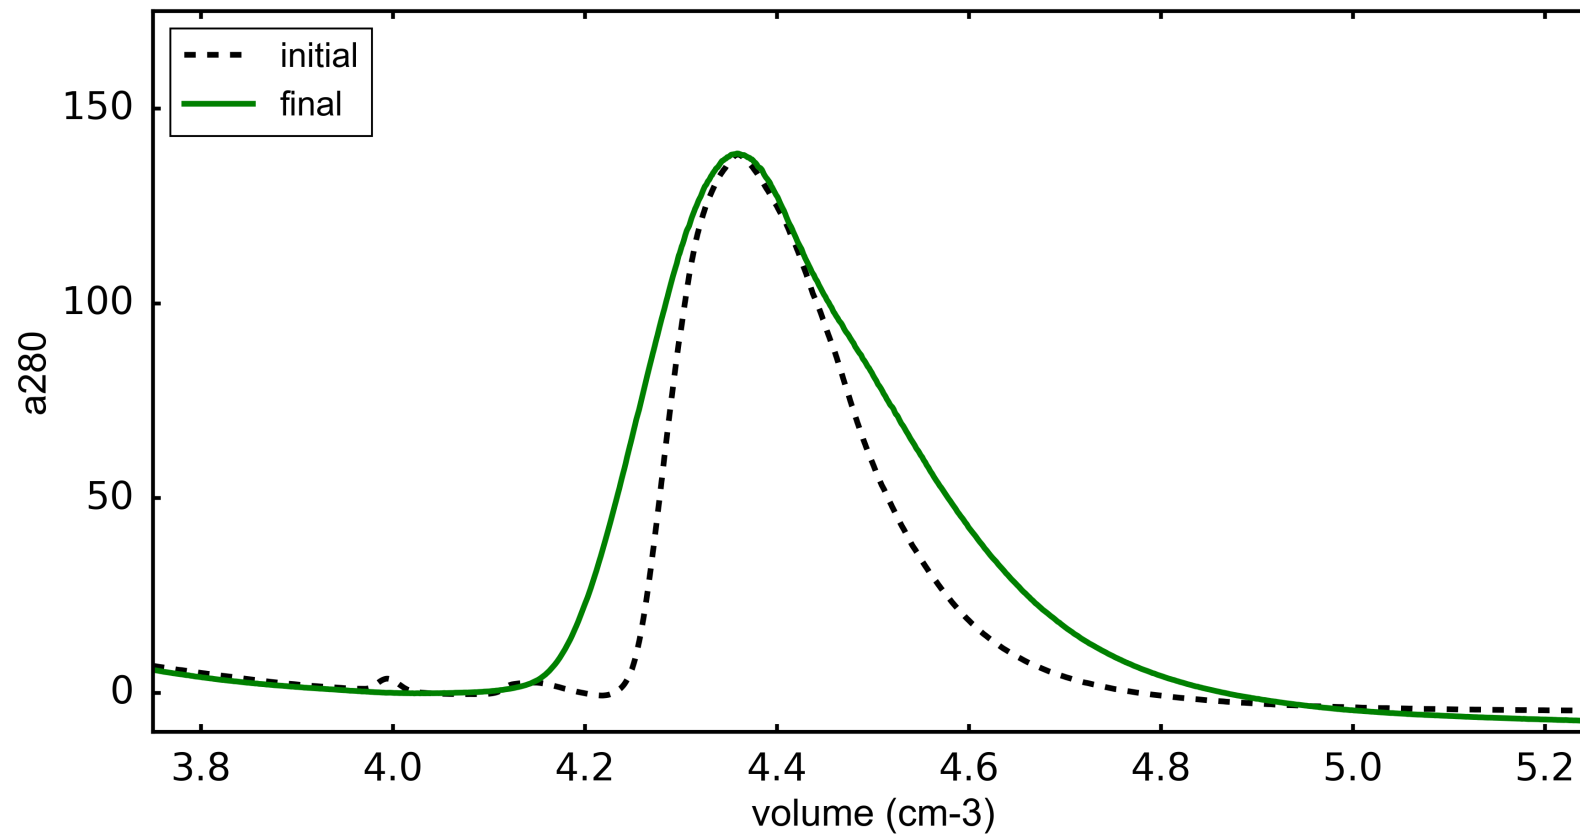

Figure S7

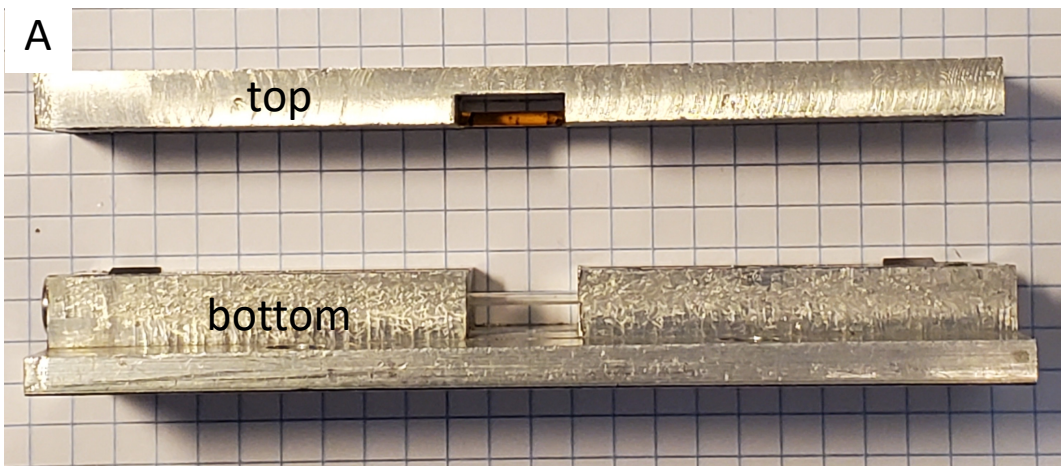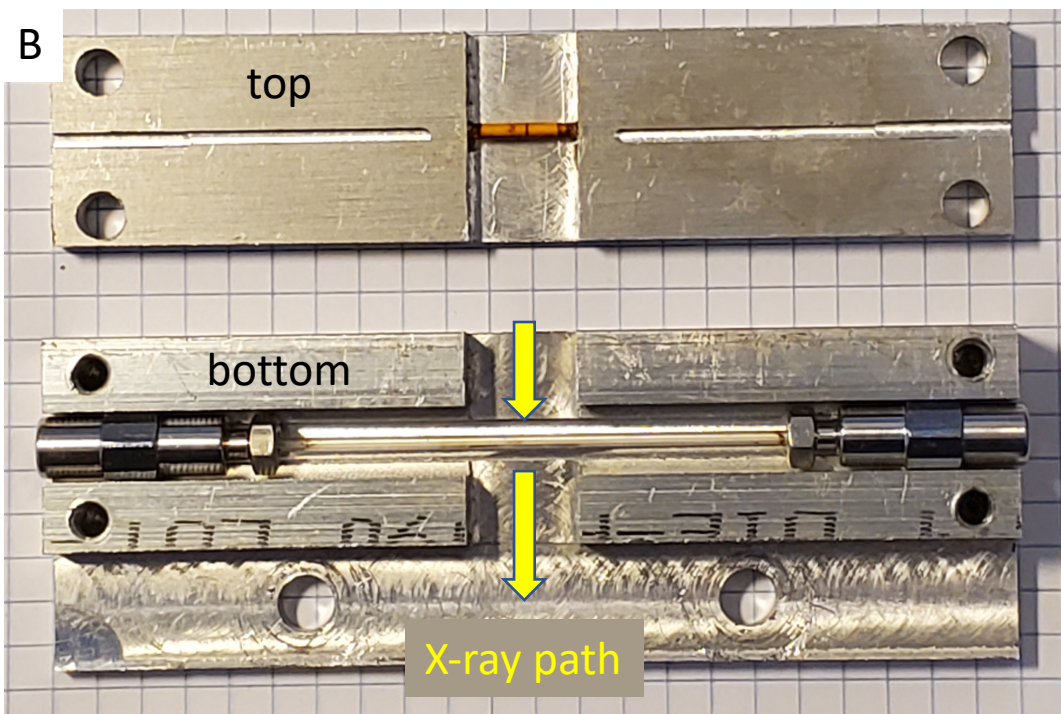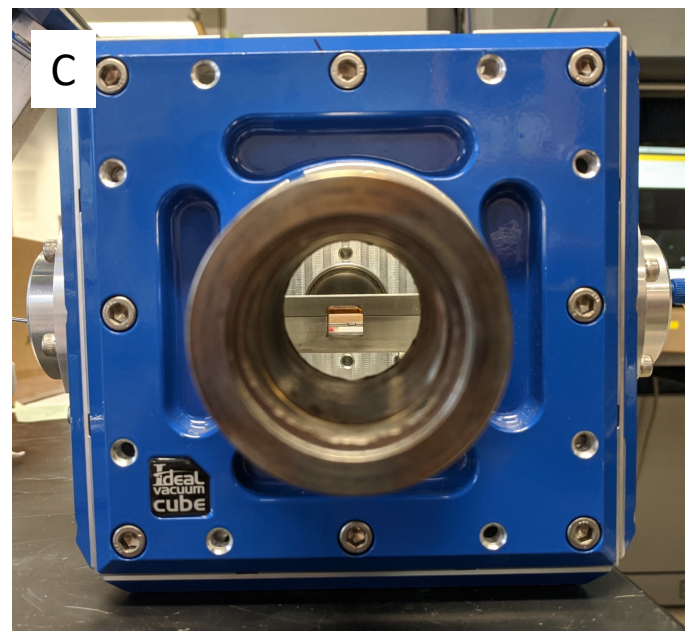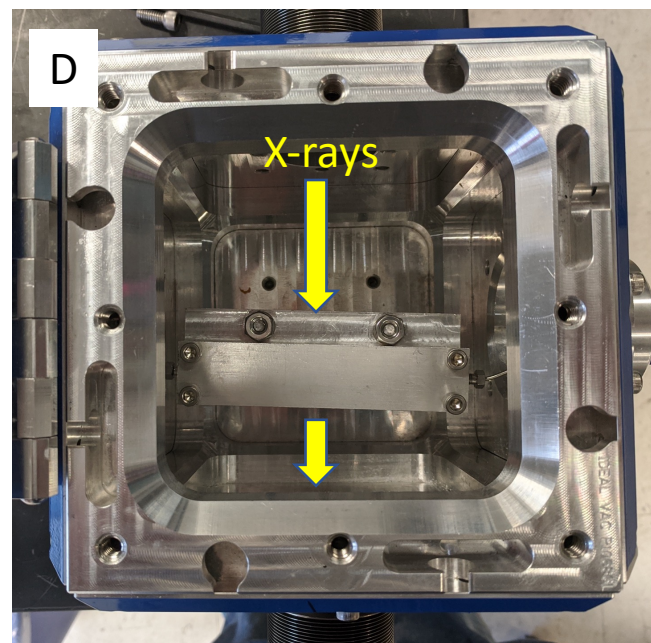

Figure S8

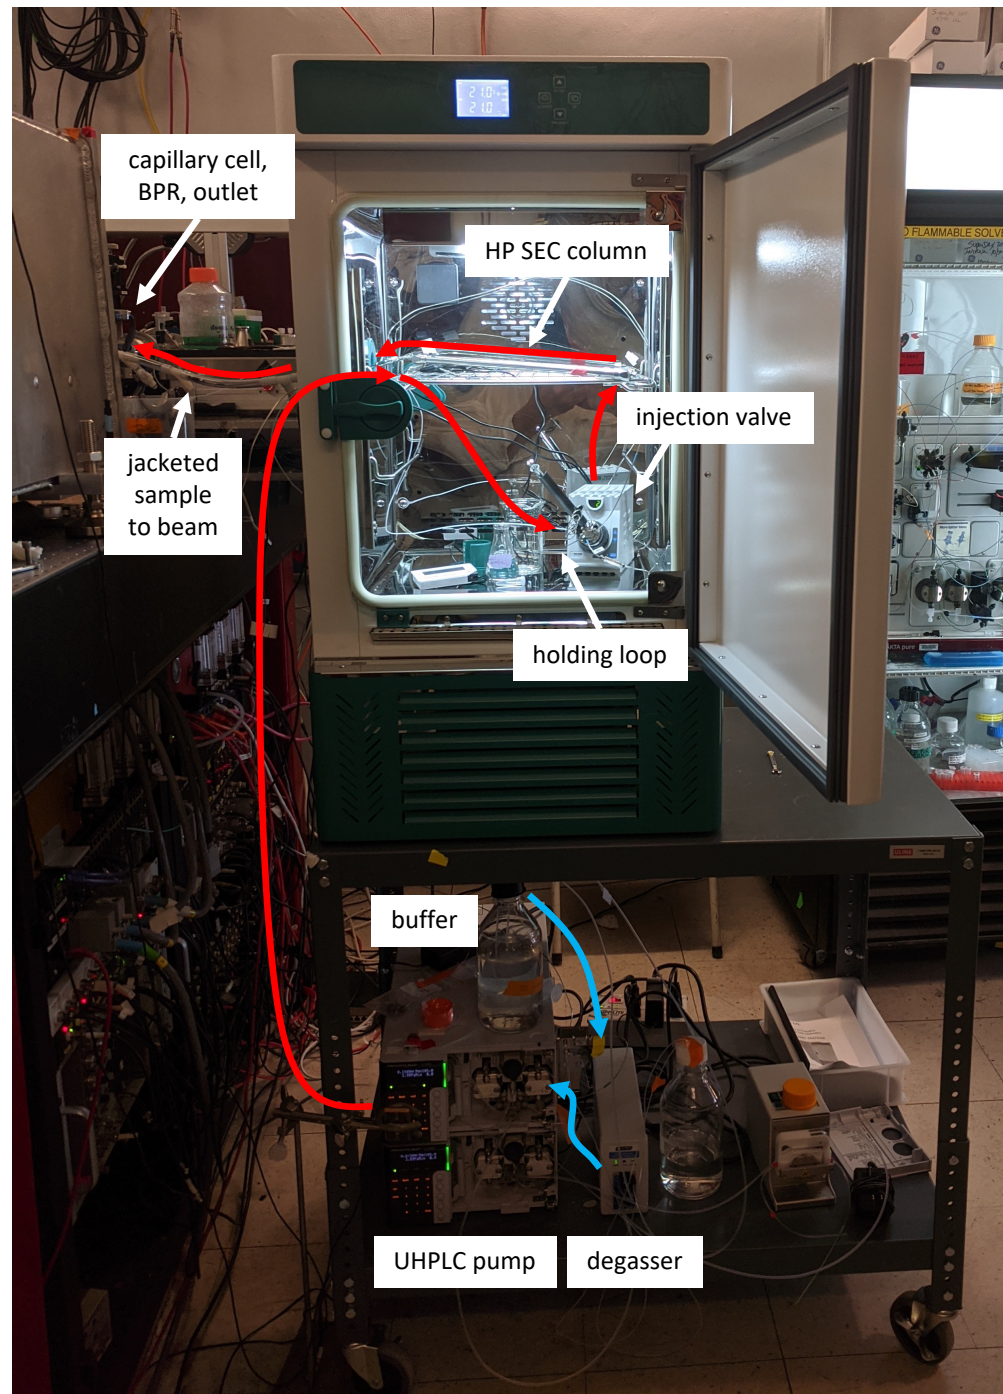

Supplement: PRO-31-e4489-s001.pdf [file PRO-31-e4489-s001.pdf]
